# Supplementary material
Source: Research Square preprint supplement (doi:10.21203/rs.3.rs-10160868/v1)
Supplement: Supplementary file 1 [file 3ecf5bf5a92452fc7a996a5b.docx]

Supplementary Information

**Sensory processing sensitivity is associated with sharper categorical transitions and stronger choice persistence in the Laurel–Yanny illusion**

Hirohito M. Kondo1,* and Daniel Pressnitzer2

1School of Psychology, Chukyo University, Nagoya, Aichi 466-8666, Japan

2Laboratoire des systèmes perceptifs, Département d'études cognitives, École normale supérieure, PSL University, CNRS, 75005 Paris, France

***Corresponding author**

Hirohito M. Kondo, Ph.D.
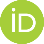
 <https://orcid.org/0000-0002-7444-4996>

School of Psychology

Chukyo University

101-2 Yagoto Honmachi, Showa, Nagoya, Aichi 466-8666, Japan

E-mail: kondo@lets.chukyo-u.ac.jp

**Supplementary Methods**

**Same-level response-history analysis**

We conducted an additional Bayesian logistic mixed-effects analysis to distinguish immediate choice-history dependence from response history tied to repeated presentations of the same stimulus level. The analysis used the same preprocessing criteria as the main response-history analysis. We excluded participants whose overall proportion of “Yanny” responses was below 0.10 or above 0.90. This resulted in 44 participants and 5,280 trials.

For each participant and trial, we first coded the immediately preceding response on trial *t* − 1 (prevResp; 1 = Yanny, 0 = Laurel) and the immediately preceding stimulus level (prevStim). We then constructed a same-level response-history variable. For each participant and each stimulus level, prevSameResp was defined as the response given the last time that same stimulus level had been presented. We also computed prevSameLag as the number of trials elapsed since the same stimulus level was last presented. Trials for which either the immediate previous response or the same-level previous response was undefined were excluded from this supplementary analysis, leaving 5,016 trials from 44 participants. The mean same-level lag was 5.79 trials (*SD* = 4.84; median = 4; range = 1–35).

Let *yjt* denote the response of participant *j* on trial *t* (1 = Yanny, 0 = Laurel). The conservative continuous-score model was specified as:

. (1)

Continuous predictors were z-standardized and denoted with the subscript *z*, whereas binary history predictors were mean-centered and denoted with the subscript *c*. Models were fitted using the same brms settings and weakly informative priors as the main response-history analyses: four chains, 4,000 iterations per chain, 2,000 warm-up iterations, and participant-specific random intercepts. Posterior summaries are reported as posterior means with 95% credible intervals (CrI).

The main terms of interest were hsp*z* × prevResp*c*, indexing sensitivity-related modulation of immediate choice history, and hsp*z* × prevSameResp*c*, indexing sensitivity-related modulation of same-level response history.

We also fit a corresponding group-based model:

. (2)

Here, class indicated the low, medium, or high HSP group, with the low HSP group serving as the reference level. Group-specific odds ratios were derived from posterior draws by exponentiating the relevant linear combinations of coefficients. The model allowed us to compare how immediate previous-response effects and same-level previous-response effects varied across HSP groups.

**Supplementary Note 1**

**Separating immediate and same-level response history**

Requiring both immediate and same-level response history yielded an analysis set of 5,016 trials from 44 participants. Same-level response history was unavailable for the first presentation of each stimulus level for each participant. Same-level repetitions occurred after a mean lag of 5.79 trials, indicating that the analysis captured relatively local response history tied to repeated stimulus levels.

The continuous HSP score model showed that sensitivity-related modulation was most clearly expressed in immediate choice history. The interaction between HSP score and the immediately preceding response was credibly positive (*β* = 0.229, 95% CrI [0.069, 0.389], OR = 1.26 [1.07, 1.48]). In contrast, the interaction between HSP score and the previous stimulus level was small and uncertain (*β* = 0.049, 95% CrI [−0.029, 0.127], OR = 1.05 [0.97, 1.14]). The interaction between HSP score and the previous response made at the same stimulus level was also small and uncertain (*β* = 0.050, 95% CrI [−0.101, 0.198], OR = 1.05 [0.90, 1.22]). Thus, higher sensory processing sensitivity was associated with stronger carryover from the immediately preceding categorical decision, rather than with a general increase in acoustic serial dependence or same-level response history.

The group-based model provided a convergent pattern. The effect of the immediately preceding response differed across HSP groups: it was negative in the low HSP group (*β* = −0.611, 95% CrI [−0.925, −0.299], OR = 0.54 [0.40, 0.74]), near zero in the medium HSP group (*β* = −0.046, 95% CrI [−0.314, 0.228], OR = 0.96 [0.73, 1.26]), and positive in the high HSP group (*β* = 0.286, 95% CrI [0.024, 0.548], OR = 1.33 [1.02, 1.73]). By contrast, same-level previous response strongly predicted current choices in all groups (low: OR = 8.75 [6.47, 11.90]; medium: OR = 9.73 [7.50, 12.54]; high: OR = 12.7 [9.88, 16.51]). This indicates that same-level response consistency was robust across participants, whereas the sensitivity-related modulation was most clearly expressed in the immediate previous-response effect.

These findings support the interpretation that sensory processing sensitivity is linked to immediate decision inertia under auditory ambiguity. At the same time, the strong same-level response-history effect indicates that participants were also highly consistent when the same stimulus level reappeared. Because same-level response history may reflect either stimulus-specific memory or stable response tendencies at a given acoustic level, this supplementary analysis should be interpreted as clarifying the structure of history effects rather than as isolating a distinct memory mechanism.
